# Supplementary material for: Accuracy of Noninvasive Scoring Systems in Assessing Liver Fibrosis in Patients with Nonalcoholic Fatty Liver Disease: A Systematic Review and Meta-Analysis
Source: PubMed Central journal article supplement — Gut Liver. 2022 Feb 23;16(6):952–63. doi: 10.5009/gnl210391 (PMC9668505; doi:10.5009/gnl210391), 2022-02-23
Supplement: gnl-16-6-952-supple.pdf [file gnl-16-6-952-supple.pdf]

## Supplementary Material

### Table of Contents

#### I. Supplementary Materials and Methods

**Search strategy and results**

**Risk of bias**

**Publication bias**

#### II. Supplementary Tables

#### III. Supplementary Figures

## Supplementary Materials and Methods

### 1. Search strategy and results

#### (1) OVID-MEDLINE

| No. | Keywords                                                                                                                                                                                                                                                                                                                                                                                                                                                                                                                                                                                                                                                                                                  | Results   |
|-----|-----------------------------------------------------------------------------------------------------------------------------------------------------------------------------------------------------------------------------------------------------------------------------------------------------------------------------------------------------------------------------------------------------------------------------------------------------------------------------------------------------------------------------------------------------------------------------------------------------------------------------------------------------------------------------------------------------------|-----------|
| 1   | exp Non-alcoholic Fatty Liver Disease                                                                                                                                                                                                                                                                                                                                                                                                                                                                                                                                                                                                                                                                     | 13,319    |
| 2   | Non?alcohol* Fatty Liver.tw                                                                                                                                                                                                                                                                                                                                                                                                                                                                                                                                                                                                                                                                               | 10,844    |
| 3   | (non?alcohol* steatohepatitis OR NAFLD OR steatosis).tw                                                                                                                                                                                                                                                                                                                                                                                                                                                                                                                                                                                                                                                   | 33,228    |
| 4   | OR/1-3                                                                                                                                                                                                                                                                                                                                                                                                                                                                                                                                                                                                                                                                                                    | 37,617    |
| 5   | (FIB-4 OR fibrosis-4 index OR NAFLD fibrosis score).tw                                                                                                                                                                                                                                                                                                                                                                                                                                                                                                                                                                                                                                                    | 1,555     |
| 6   | 4 AND 5                                                                                                                                                                                                                                                                                                                                                                                                                                                                                                                                                                                                                                                                                                   |           |
| 7   | (Randomized Controlled Trials as Topic/ or randomized controlled trial/ or Random Allocation/ or Double Blind Method/ or Single Blind Method/ or clinical trial/ or clinical trial, phase i.pt. or clinical trial, phase ii.pt. or clinical trial, phase iii.pt. or clinical trial, phase iv.pt. or controlled clinical trial.pt. or randomized controlled trial.pt. or multicenter study. pt. or clinical trial.pt. or exp Clinical Trials as topic/ or (clinical adj trial*).tw. or ((singl* or doubl* or treb* or tripl*) adj (blind*3 or mask*3)).tw. or PLACEBOS/ or placebo*.tw. or randomly allocated.tw. or (allocated adj2 random*).tw.) not (case report.tw. or letter/ or historical article/) | 1,644,777 |
| 8   | Epidemiologic Studies/ or exp Case Control Studies/ or exp Cohort Studies/ or Case-control.tw. or (cohort adj (study or studies)).tw. or Cohort analy\$.tw. or (Follow up adj (study or studies)).tw. or (observational adj (study or studies)).tw. or Longitudinal.tw. or Retrospective.tw.or Cross sectional.tw. or Cross-sectional studies/                                                                                                                                                                                                                                                                                                                                                            | 3,135,261 |
| 9   | OR/7-8                                                                                                                                                                                                                                                                                                                                                                                                                                                                                                                                                                                                                                                                                                    | 4,351,134 |
| 10  | 6 AND 9                                                                                                                                                                                                                                                                                                                                                                                                                                                                                                                                                                                                                                                                                                   | 322       |

#### (2) OVID-EMBASE

| No. | Keywords                                                                                                                                                                                                                                                                                                                                                                                                                                                                                                                                                                                                                                                       | Results   |
|-----|----------------------------------------------------------------------------------------------------------------------------------------------------------------------------------------------------------------------------------------------------------------------------------------------------------------------------------------------------------------------------------------------------------------------------------------------------------------------------------------------------------------------------------------------------------------------------------------------------------------------------------------------------------------|-----------|
| 1   | exp nonalcoholic fatty liver/                                                                                                                                                                                                                                                                                                                                                                                                                                                                                                                                                                                                                                  | 46,820    |
| 2   | Non?alcohol* Fatty Liver.tw                                                                                                                                                                                                                                                                                                                                                                                                                                                                                                                                                                                                                                    | 16,443    |
| 3   | (non?alcohol* steatohepatitis OR NAFLD OR steatosis).tw                                                                                                                                                                                                                                                                                                                                                                                                                                                                                                                                                                                                        | 57,251    |
| 4   | OR/1-3                                                                                                                                                                                                                                                                                                                                                                                                                                                                                                                                                                                                                                                         | 72,477    |
| 5   | (FIB-4 OR fibrosis-4 index OR NAFLD fibrosis score).tw                                                                                                                                                                                                                                                                                                                                                                                                                                                                                                                                                                                                         | 3,833     |
| 6   | 4 AND 5                                                                                                                                                                                                                                                                                                                                                                                                                                                                                                                                                                                                                                                        | 1,638     |
| 7   | (Clinical Trial/ OR Randomized Controlled Trial/ OR controlled clinical trial/ OR multicenter study/ OR Phase 3 clinical trial/ OR Phase 4 clinical trial/ OR exp RANDOMIZATION/ OR Single Blind Procedure/ OR Double Blind Procedure/ OR Crossover Procedure/ OR PLACEBO/ OR randomi?ed controlled trial\$.tw. OR rct.tw. OR (random\$ adj2 allocat\$).tw. OR single blind\$.tw. OR double blind\$.tw. OR ((treble or triple) adj blind\$).tw. OR placebo\$.tw. OR Prospective Study/) not (Case Study/ OR case report.tw. OR abstract report/ or letter/ OR Conference proceeding.pt. OR Conference abstract.pt. OR Editorial.pt. OR Letter.pt. OR Note.pt.) | 1,799,598 |
| 8   | Clinical study/ OR Case control study OR Family study/ OR Longitudinal study/ OR Retrospective study OR (Prospective study/ not Randomized controlled trials/) OR Cohort analysis/ OR (Cohort adj (study or studies)).mp. OR (Case control adj (study or studies)).tw.OR (follow up adj (study or studies)).tw.OR (observational adj (study or studies)).tw.OR (epidemiologic\$ adj (study or studies)).tw. OR (cross sectional adj (study or studies)).tw.                                                                                                                                                                                                    | 2,955,206 |
| 9   | OR/7-8                                                                                                                                                                                                                                                                                                                                                                                                                                                                                                                                                                                                                                                         | 4,169,300 |
| 10  | 6 AND 9                                                                                                                                                                                                                                                                                                                                                                                                                                                                                                                                                                                                                                                        | 818       |

### (3) Cochrane Library

| No. | Keywords                                                                                | Results |
|-----|-----------------------------------------------------------------------------------------|---------|
| 1   | [mh "Non-alcoholic Fatty Liver Disease"]                                                | 971     |
| 2   | ["Nonalcohol* Fatty Liver" OR "Non-alcohol* Fatty Liver" OR "Non alcohol* Fatty Liver"] | 7       |
| 3   | ["non?alcohol* steatohepatitis" OR NAFLD OR steatosis]                                  | 2,608   |
| 4   | {OR #1-#3}                                                                              | 2,940   |
| 5   | (FIB-4 OR fibrosis-4 index OR NAFLD fibrosis score)                                     | 377     |
| 6   | #4 AND #5                                                                               | 286     |

### (4) KMBASE

| No. | Keywords                                               | Results |
|-----|--------------------------------------------------------|---------|
| 1   | (((ALL=Non-alcoholic Fatty Liver] AND [ALL=FIB-4])     | 8       |
| 2   | ([ALL=Non-alcoholic Fatty Liver] AND [ALL=fibrosis-4]) | 7       |

### (5) KISS

| No. | Keywords                                 | Results |
|-----|------------------------------------------|---------|
| 1   | Non-alcoholic Fatty Liver AND FIB-4      | 153     |
| 2   | Non-alcoholic Fatty Liver AND fibrosis-4 | 141     |

## 4. Risk of bias

### (1) QUADAS tool

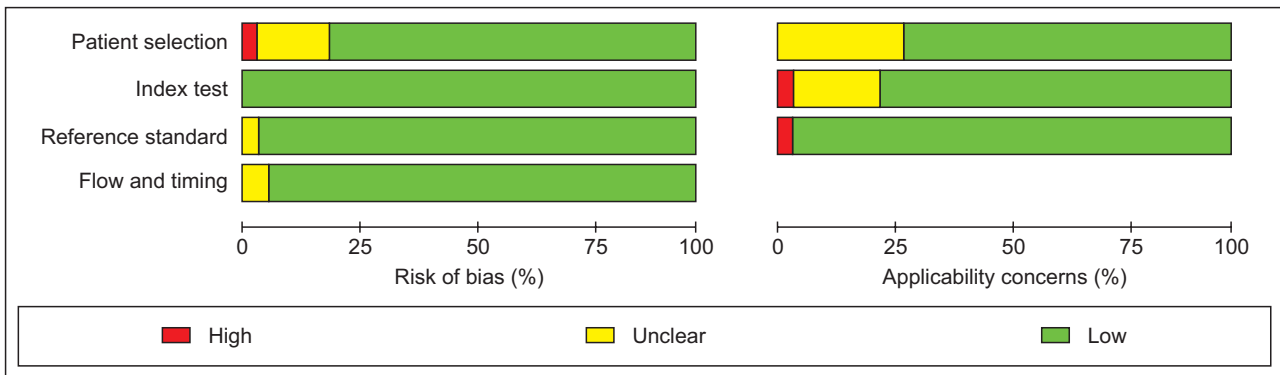

|                    | Risk of bias      |            |                    | Applicability concerns |                   |            |                    |
|--------------------|-------------------|------------|--------------------|------------------------|-------------------|------------|--------------------|
|                    | Patient selection | Index test | Reference standard | Flow and timing        | Patient selection | Index test | Reference standard |
| Aida 2015          | ?                 | ●          | ●                  | ●                      | ?                 | ?          | ●                  |
| Anstee 2019        | ?                 | ●          | ●                  | ●                      | ?                 | ●          | ●                  |
| Balakrishnan 2020  | ●                 | ●          | ●                  | ●                      | ●                 | ●          | ●                  |
| Boursier 2019      | ●                 | ●          | ●                  | ●                      | ●                 | ?          | ●                  |
| Carli 2019         | ●                 | ●          | ?                  | ?                      | ●                 | ●          | ●                  |
| Chan 2015          | ●                 | ●          | ●                  | ●                      | ●                 | ●          | ●                  |
| Chan 2019          | ●                 | ●          | ●                  | ●                      | ●                 | ●          | ●                  |
| Cui 2015           | ●                 | ●          | ●                  | ●                      | ●                 | ●          | ●                  |
| Demir 2013         | ●                 | ●          | ●                  | ●                      | ●                 | ●          | ●                  |
| Goh 2015           | ●                 | ●          | ●                  | ●                      | ●                 | ●          | ●                  |
| Gutierrez 2013     | ●                 | ●          | ●                  | ●                      | ●                 | ●          | ●                  |
| Joo 2018           | ●                 | ●          | ●                  | ●                      | ●                 | ●          | ●                  |
| Jun 2017           | ●                 | ●          | ●                  | ●                      | ●                 | ●          | ●                  |
| Kakisaka 2018      | ●                 | ●          | ●                  | ●                      | ●                 | ●          | ●                  |
| Kao 2020           | ?                 | ●          | ●                  | ●                      | ?                 | ?          | ●                  |
| Kaya 2019          | ●                 | ●          | ●                  | ●                      | ●                 | ●          | ●                  |
| Kim 2013           | ●                 | ●          | ●                  | ●                      | ●                 | ?          | ●                  |
| Labenz 2018        | ●                 | ●          | ●                  | ●                      | ●                 | ●          | ●                  |
| Lang 2020          | ●                 | ●          | ●                  | ●                      | ?                 | ?          | ●                  |
| Lum 2020           | ●                 | ●          | ●                  | ●                      | ●                 | ●          | ●                  |
| McPherson 2013     | ●                 | ●          | ●                  | ●                      | ?                 | ●          | ●                  |
| Meneses 2020       | ●                 | ●          | ●                  | ●                      | ?                 | ●          | ●                  |
| Nasr 2016          | ●                 | ●          | ●                  | ●                      | ●                 | ?          | ●                  |
| Ooi 2017           | ●                 | ●          | ●                  | ?                      | ?                 | ●          | ●                  |
| Patel 2018         | ?                 | ●          | ●                  | ●                      | ?                 | ●          | ●                  |
| Petta 2015         | ?                 | ●          | ●                  | ●                      | ●                 | ●          | ●                  |
| Petta 2019         | ●                 | ●          | ●                  | ●                      | ●                 | ●          | ●                  |
| Siddiqui 2019      | ?                 | ●          | ●                  | ●                      | ●                 | ●          | ●                  |
| Singh 2020         | ●                 | ●          | ●                  | ●                      | ?                 | ●          | ●                  |
| Treepasertsuk 2016 | ●                 | ●          | ●                  | ●                      | ●                 | ●          | ●                  |
| Wong 2008          | ●                 | ●          | ●                  | ●                      | ●                 | ●          | ●                  |
| Wong 2010          | ●                 | ●          | ●                  | ●                      | ●                 | ?          | ●                  |
| Xun 2012           | ●                 | ●          | ●                  | ●                      | ●                 | ●          | ●                  |
| Yang 2019          | ●                 | ●          | ●                  | ●                      | ●                 | ●          | ●                  |
| Yoneda 2013        | ●                 | ●          | ●                  | ●                      | ?                 | ●          | ●                  |
| Zhou 2019          | ●                 | ●          | ●                  | ●                      | ●                 | ●          | ●                  |

● High    ? Unclear    ● Low

## (2) QUIPS tool

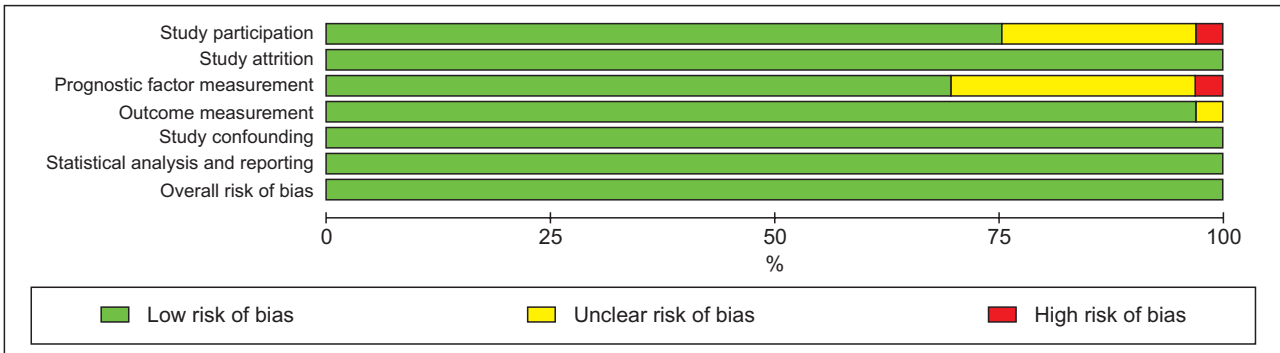

|                     | Study participation | Study attrition | Prognostic factor measurement | Outcome measurement | Study confounding | Statistical analysis and reporting | Overall risk of bias |
|---------------------|---------------------|-----------------|-------------------------------|---------------------|-------------------|------------------------------------|----------------------|
| Aida 2015           | ?                   | ●               | ?                             | ●                   | ●                 | ●                                  | ●                    |
| Anstee 2019         | ?                   | ●               | ●                             | ●                   | ●                 | ●                                  | ●                    |
| Balakrishnan 2020   | ●                   | ●               | ●                             | ●                   | ●                 | ●                                  | ●                    |
| Boursier 2019       | ●                   | ●               | ?                             | ●                   | ●                 | ●                                  | ●                    |
| Carli 2019          | ●                   | ●               | ●                             | ●                   | ●                 | ●                                  | ●                    |
| Chan 2015           | ●                   | ●               | ●                             | ●                   | ●                 | ●                                  | ●                    |
| Chan 2019           | ●                   | ●               | ●                             | ●                   | ●                 | ●                                  | ●                    |
| Cui 2015            | ●                   | ●               | ●                             | ●                   | ●                 | ●                                  | ●                    |
| Demir 2013          | ●                   | ●               | ●                             | ●                   | ●                 | ●                                  | ●                    |
| Goh 2015            | ●                   | ●               | ●                             | ●                   | ●                 | ●                                  | ●                    |
| Joo 2017            | ●                   | ●               | ●                             | ?                   | ●                 | ●                                  | ●                    |
| Jun 2017            | ●                   | ●               | ●                             | ●                   | ●                 | ●                                  | ●                    |
| Kakisaka 2018       | ●                   | ●               | ●                             | ●                   | ●                 | ●                                  | ●                    |
| Kao 2020            | ?                   | ●               | ?                             | ●                   | ●                 | ●                                  | ●                    |
| Kaya 2020           | ●                   | ●               | ●                             | ●                   | ●                 | ●                                  | ●                    |
| Kim 2013            | ?                   | ●               | ?                             | ●                   | ●                 | ●                                  | ●                    |
| Labenz 2018         | ●                   | ●               | ●                             | ●                   | ●                 | ●                                  | ●                    |
| Lang 2020           | ●                   | ●               | ?                             | ●                   | ●                 | ●                                  | ●                    |
| Lum 2020            | ●                   | ●               | ●                             | ●                   | ●                 | ●                                  | ●                    |
| McPherson 2013      | ●                   | ●               | ?                             | ●                   | ●                 | ●                                  | ●                    |
| Meneses 2020        | ●                   | ●               | ?                             | ●                   | ●                 | ●                                  | ●                    |
| Nasr 2016           | ?                   | ●               | ●                             | ●                   | ●                 | ●                                  | ●                    |
| Ooi 2017            | ●                   | ●               | ?                             | ●                   | ●                 | ●                                  | ●                    |
| Patel 2018          | ?                   | ●               | ●                             | ●                   | ●                 | ●                                  | ●                    |
| Perez 2013          | ●                   | ●               | ●                             | ●                   | ●                 | ●                                  | ●                    |
| Petta 2015          | ?                   | ●               | ●                             | ●                   | ●                 | ●                                  | ●                    |
| Petta 2019          | ●                   | ●               | ●                             | ●                   | ●                 | ●                                  | ●                    |
| Siddiqui 2020       | ?                   | ●               | ●                             | ●                   | ●                 | ●                                  | ●                    |
| Singh 2020          | ●                   | ●               | ?                             | ●                   | ●                 | ●                                  | ●                    |
| Treeprasertsuk 2016 | ●                   | ●               | ●                             | ●                   | ●                 | ●                                  | ●                    |
| Wong 2008           | ●                   | ●               | ●                             | ●                   | ●                 | ●                                  | ●                    |
| Wong 2010           | ●                   | ●               | ●                             | ●                   | ●                 | ●                                  | ●                    |
| Xun 2012            | ●                   | ●               | ●                             | ●                   | ●                 | ●                                  | ●                    |
| Yang 2019           | ●                   | ●               | ●                             | ●                   | ●                 | ●                                  | ●                    |
| Yoneda 2013         | ●                   | ●               | ?                             | ●                   | ●                 | ●                                  | ●                    |
| Zhou 2019           | ●                   | ●               | ●                             | ●                   | ●                 | ●                                  | ●                    |

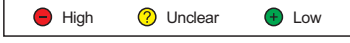

(3) Funnel plot for analysis publication bias

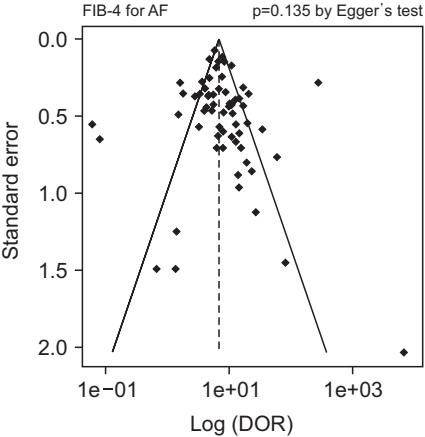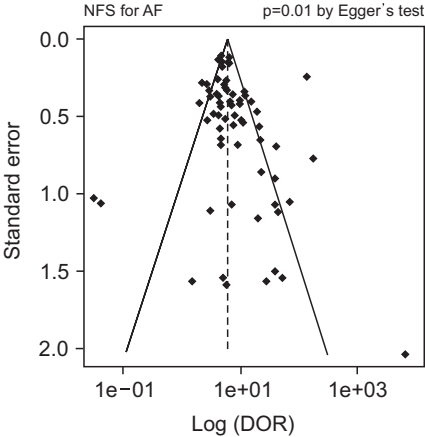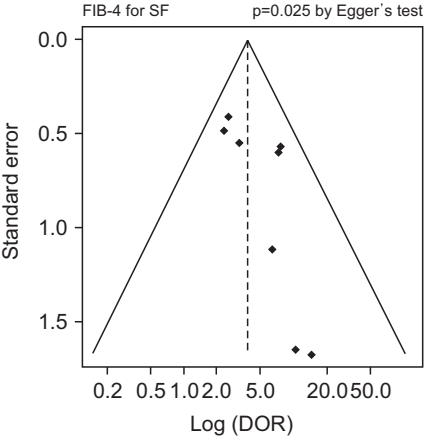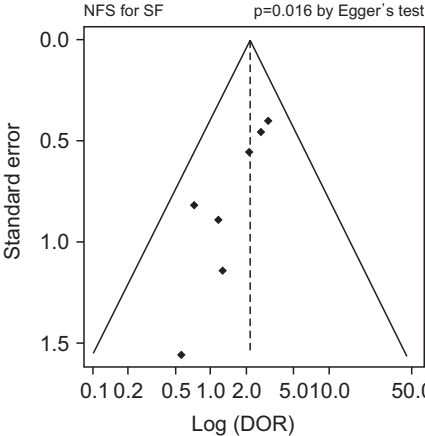

**Supplementary Table 1.** Summary Statistics of FIB-4 at Various Thresholds for Prediction of Advanced Fibrosis

| Author (year)                      | No. of samples | Threshold | Advanced fibrosis (95% CI) |                   |                       |                      |                   |                   |
|------------------------------------|----------------|-----------|----------------------------|-------------------|-----------------------|----------------------|-------------------|-------------------|
|                                    |                |           | SE                         | SP                | DOR                   | LR+                  | LR-               | AUC               |
| Threshold: 1.02–1.45               |                |           |                            |                   |                       |                      |                   |                   |
| Siddiqui, 2020                     | 1,904          | 1.02      | 0.9 [0.87, 0.92]           | 0.49 [0.46, 0.52] | 8.6 [6.37, 11.61]     | 1.76 [1.66, 1.87]    | 0.20 [0.15, 0.26] | 0.81 [0.73, 0.89] |
| Anstee, 2019                       | 3,123          | 1.3       | 0.82 [0.8, 0.84]           | 0.57 [0.54, 0.6]  | 6.03 [5.08, 7.15]     | 1.90 [1.76, 2.05]    | 0.31 [0.28, 0.35] | 0.78 [0.76, 0.80] |
| Balakrishnan, 2020                 | 99             | 1.3       | 0.57 [0.39, 0.73]          | 0.77 [0.65, 0.87] | 4.5 [1.86, 10.87]     | 2.51 [1.46, 4.31]    | 0.55 [0.37, 0.82] | 0.77 [0.68, 0.87] |
| Cui, 2015                          | 102            | 1.3       | 0.84 [0.6, 0.97]           | 0.71 [0.60, 0.81] | 13.11 [3.5, 49.14]    | 2.91 [1.97, 4.29]    | 0.22 [0.07, 0.63] | 0.86 [0.77, 0.94] |
| Joo, 2017                          | 315            | 1.3       | 0.73 [0.59, 0.84]          | 0.61 [0.55, 0.67] | 4.2 [2.21, 7.99]      | 1.87 [1.49, 2.33]    | 0.44 [0.28, 0.69] | 0.86 [0.81, 0.92] |
| Jun, 2017                          | 328            | 1.3       | 0.57 [0.43, 0.69]          | 0.56 [0.5, 0.62]  | 1.66 [0.95, 2.92]     | 1.28 [0.99, 1.66]    | 0.77 [0.56, 1.05] | 0.58 [0.51, 0.66] |
| Kaya, 2020                         | 463            | 1.3       | 0.64 [0.53, 0.75]          | 0.74 [0.69, 0.78] | 5.06 [3.04, 8.41]     | 2.45 [1.94, 3.09]    | 0.48 [0.36, 0.65] | 0.73 [0.67, 0.79] |
| Ki, 2013                           | 142            | 1.3       | 0.87 [0.74, 0.95]          | 0.55 [0.45, 0.65] | 8.22 [3.19, 21.2]     | 1.94 [1.51, 2.48]    | 0.23 [0.10, 0.50] | 0.82 [0.75, 0.88] |
| Labenz, 2018                       | 261            | 1.3       | 0.68 [0.52, 0.82]          | 0.62 [0.55, 0.68] | 3.49 [1.71, 7.11]     | 1.78 [1.36, 2.33]    | 0.51 [0.32, 0.81] | 0.71 [0.60, 0.80] |
| Lang, 2020                         | 95             | 1.3       | 0.84 [0.66, 0.95]          | 0.72 [0.59, 0.82] | 13.29 [4.42, 39.98]   | 2.98 [1.95, 4.54]    | 0.22 [0.09, 0.50] | 0.85 [0.78, 0.94] |
| McPherson, 2013a                   | 70             | 1.3       | 0.82 [0.57, 0.96]          | 0.77 [0.64, 0.88] | 15.94 [3.92, 64.86]   | 3.63 [2.11, 6.26]    | 0.22 [0.08, 0.64] | 0.86 [0.77, 0.96] |
| McPherson, 2013b                   | 235            | 1.3       | 0.8 [0.65, 0.91]           | 0.72 [0.65, 0.78] | 10.69 [4.65, 24.62]   | 2.89 [2.20, 3.79]    | 0.27 [0.14, 0.50] | 0.85 [0.79, 0.92] |
| Patel, 2018a                       | 114            | 1.3       | 0.31 [0.09, 0.61]          | 0.16 [0.09, 0.24] | 0.08 [0.02, 0.30]     | 0.36 [0.16, 0.82]    | 4.37 [2.45, 7.78] | 0.25 [0.1, 0.39]  |
| Patel, 2018b                       | 151            | 1.3       | 0.08 [0.02, 0.19]          | 0.43 [0.34, 0.54] | 0.06 [0.02, 0.19]     | 0.13 [0.05, 0.35]    | 2.12 [1.67, 2.69] | 0.25 [0.19, 0.32] |
| Petta, 2019                        | 968            | 1.3       | 0.68 [0.62, 0.73]          | 0.76 [0.73, 0.79] | 6.76 [4.98, 9.20]     | 2.85 [2.44, 3.34]    | 0.42 [0.35, 0.50] | 0.77 [0.67, 0.87] |
| Treprasertsuk, 2016                | 139            | 1.3       | 0.56 [0.21, 0.86]          | 0.84 [0.76, 0.90] | 6.49 [1.61, 26.19]    | 3.43 [1.70, 6.94]    | 0.53 [0.25, 1.10] | 0.74 [0.70, 0.78] |
| Wong, 2010                         | 246            | 1.3       | 0.64 [0.5, 0.77]           | 0.8 [0.74, 0.85]  | 7.2 [3.75, 13.82]     | 3.21 [2.27, 4.53]    | 0.44 [0.31, 0.63] | 0.80 [0.74, 0.87] |
| Xun, 2012                          | 152            | 1.3       | 0.67 [0.45, 0.84]          | 0.67 [0.58, 0.75] | 4.1 [1.62, 10.33]     | 2.03 [1.39, 2.95]    | 0.49 [0.27, 0.88] | 0.75 [0.63, 0.87] |
| Lum, 2020                          | 263            | 1.45      | 0.65 [0.54, 0.75]          | 0.67 [0.6, 0.74]  | 3.81 [2.19, 6.62]     | 1.98 [1.52, 2.57]    | 0.52 [0.37, 0.71] | 0.68 [0.61, 0.75] |
| Singh, 2020                        | 1,134          | 1.45      | 0.73 [0.68, 0.78]          | 0.64 [0.61, 0.68] | 4.95 [3.75, 6.53]     | 2.06 [1.83, 2.30]    | 0.41 [0.34, 0.49] | 0.77 [0.74, 0.80] |
| Overall                            |                |           | 0.69 [0.59, 0.77]          | 0.64 [0.57, 0.71] | 4.11 [2.24, 7.55]     | 1.96 [1.49, 2.57]    | 0.47 [0.33, 0.67] | 0.73 [0.67, 0.80] |
| Heterogeneity - I <sup>2</sup> (%) |                |           | 94.4 (NA, NA)              | 98.4 (NA, NA)     | 86.7 (81.5, 90.5)     | 97.7 (NA, NA)        | 96.3 (NA, NA)     | 99.5 (99.5, 99.6) |
| p-value                            |                |           | <0.001                     | <0.001            | <0.001                | <0.001               | <0.001            | <0.001            |
| Threshold: 1.515–2.09              |                |           |                            |                   |                       |                      |                   |                   |
| Nasr, 2016                         | 58             | 1.6       | 0.83 [0.52, 0.98]          | 0.83 [0.69, 0.92] | 23.75 [4.34, 129.86]  | 4.79 [2.43, 9.44]    | 0.20 [0.05, 0.71] | 0.89 [0.81, 0.98] |
| Kakisaka, 2018                     | 63             | 1.62      | 0.73 [0.52, 0.88]          | 0.73 [0.56, 0.86] | 7.33 [2.37, 22.69]    | 2.70 [1.51, 4.82]    | 0.36 [0.19, 0.71] | 0.78 [0.68, 0.98] |
| Yoneda, 2013                       | 235            | 1.659     | 0.89 [0.75, 0.97]          | 0.71 [0.64, 0.77] | 20.88 [7.08, 61.53]   | 3.09 [2.42, 3.94]    | 0.14 [0.05, 0.37] | 0.87 [0.77, 0.97] |
| Siddiqui, 2020                     | 1,904          | 1.95      | 0.47 [0.43, 0.51]          | 0.9 [0.88, 0.92]  | 7.94 [6.22, 10.14]    | 4.68 [3.90, 5.62]    | 0.58 [0.54, 0.63] | 0.81 [0.73, 0.89] |
| Aida, 2015                         | 148            | 2.09      | 0.76 [0.61, 0.88]          | 0.78 [0.69, 0.86] | 11.55 [4.95, 26.94]   | 3.51 [2.35, 5.23]    | 0.30 [0.17, 0.52] | 0.81 [0.74, 0.87] |
| Overall                            |                |           | 0.74 [0.58, 0.85]          | 0.80 [0.72, 0.86] | 11.97 [7.48, 19.16]   | 3.82 [3.00, 4.88]    | 0.32 [0.20, 0.51] | 0.82 [0.78, 0.87] |
| Heterogeneity - I <sup>2</sup> (%) |                |           | 88.9 (NA, NA)              | 90.7 (NA, NA)     | 26.4 [0, 69.3]        | 76.3 (NA, NA)        | 91.5 (NA, NA)     | 48.3 [0, 79.5]    |
| p-value                            |                |           | <0.001                     | <0.001            | 0.237                 | <0.001               | <0.001            | 0.085             |
| Threshold: 2.67                    |                |           |                            |                   |                       |                      |                   |                   |
| Anstee, 2019                       | 3,123          | 2.67      | 0.36 [0.34, 0.38]          | 0.93 [0.91, 0.95] | 7.53 [5.74, 9.86]     | 5.06 [3.97, 6.44]    | 0.68 [0.66, 0.71] | 0.78 [0.76, 0.80] |
| Balakrishnan, 2020                 | 99             | 2.67      | 0.41 [0.25, 0.58]          | 1.00 [0.94, 1.00] | 86.11 [4.95, 1499.26] | 51.39 [3.16, 834.44] | 0.59 [0.45, 0.77] | 0.77 [0.68, 0.87] |
| Carti, 2019                        | 266            | 2.67      | 0.33 [0.12, 0.62]          | 0.87 [0.82, 0.91] | 3.3 [1.06, 10.27]     | 2.58 [1.22, 5.45]    | 0.75 [0.52, 1.08] | NA                |
| Joo, 2017                          | 315            | 2.67      | 0.67 [0.53, 0.79]          | 0.91 [0.87, 0.94] | 21.18 [10.44, 42.97]  | 7.43 [4.85, 11.4]    | 0.36 [0.24, 0.52] | 0.86 [0.77, 0.94] |
| Jun, 2017                          | 328            | 2.67      | 0.22 [0.12, 0.34]          | 0.87 [0.82, 0.91] | 1.84 [0.91, 3.74]     | 1.67 [0.95, 2.94]    | 0.89 [0.77, 1.03] | 0.86 [0.81, 0.92] |

**Supplementary Table 1.** Continued

| Author (year)                      | No. of samples | Threshold | Advanced fibrosis (95% CI) |                   |                         |                      |                   |                   |
|------------------------------------|----------------|-----------|----------------------------|-------------------|-------------------------|----------------------|-------------------|-------------------|
|                                    |                |           | SE                         | SP                | DOR                     | LR +                 | LR -              | AUC               |
| Kabbany, 2016                      | 50             | 2.67      | 0.67 (0.09, 0.99)          | 0.43 (0.28, 0.58) | 1.48 (0.13, 17.5)       | 9.24 (2.24, 37.96)   | 0.74 (0.56, 0.98) | 0.58 (0.51, 0.66) |
| Kaya, 2020                         | 463            | 2.67      | 0.15 (0.08, 0.24)          | 0.97 (0.95, 0.99) | 5.87 (2.49, 13.83)      | 5.07 (2.36, 10.90)   | 0.87 (0.79, 0.95) | 0.73 (0.67, 0.79) |
| Labenz, 2018                       | 261            | 2.67      | 0.39 (0.24, 0.56)          | 0.88 (0.83, 0.92) | 4.78 (2.26, 10.1)       | 3.27 (1.95, 5.50)    | 0.68 (0.53, 0.88) | 0.71 (0.69, 0.73) |
| Patel, 2018a                       | 114            | 2.67      | 0.23 (0.05, 0.54)          | 0.98 (0.93, 1.00) | 14.85 (2.21, 99.66)     | 10.2 (2.22, 46.81)   | 0.76 (0.56, 1.04) | 0.62 (0.49, 0.74) |
| Patel, 2018b                       | 151            | 2.67      | 0.56 (0.41, 0.7)           | 0.98 (0.93, 1.00) | 61.15 (13.6, 274.96)    | 22.26 (6.39, 77.50)  | 0.45 (0.33, 0.61) | 0.76 (0.69, 0.83) |
| Petta, 2015a                       | 179            | 2.67      | 0.51 (0.35, 0.67)          | 0.97 (0.93, 0.99) | 35.17 (10.94, 113.1)    | 15.81 (6.08, 41.1)   | 0.50 (0.36, 0.68) | 0.79 (0.70, 0.87) |
| Petta, 2015b                       | 142            | 2.67      | 0.24 (0.1, 0.44)           | 0.96 (0.9, 0.99)  | 6.87 (2.00, 23.65)      | 5.18 (1.86, 14.43)   | 0.78 (0.63, 0.97) | 0.70 (0.58, 0.81) |
| Petta, 2019                        | 988            | 2.67      | 0.22 (0.18, 0.28)          | 0.97 (0.95, 0.98) | 8.06 (4.91, 13.24)      | 6.38 (4.08, 9.96)    | 0.80 (0.75, 0.85) | 0.77 (0.72, 0.82) |
| Singh, 2020                        | 1,134          | 2.67      | 0.45 (0.40, 0.50)          | 0.93 (0.91, 0.95) | 11.18 (7.89, 15.85)     | 6.55 (4.94, 8.70)    | 0.59 (0.53, 0.65) | 0.77 (0.74, 0.80) |
| Wong, 2010                         | 246            | 2.67      | 0.21 (0.12, 0.34)          | 0.95 (0.91, 0.98) | 5.48 (2.18, 13.83)      | 4.40 (2.00, 9.71)    | 0.82 (0.71, 0.94) | 0.8 (0.74, 0.87)  |
| Xun, 2012                          | 152            | 2.67      | 0.38 (0.19, 0.59)          | 0.96 (0.91, 0.99) | 14.76 (4.37, 49.87)     | 8.91 (3.41, 23.25)   | 0.64 (0.47, 0.88) | 0.75 (0.63, 0.87) |
| Yang, 2019                         | 453            | 2.67      | 0.18 (0.12, 0.26)          | 0.96 (0.94, 0.98) | 5.86 (2.82, 12.19)      | 4.85 (2.52, 9.34)    | 0.84 (0.77, 0.92) | 0.57 (0.46, 0.68) |
| Yoneda, 2013                       | 235            | 2.67      | 0.63 (0.46, 0.78)          | 0.88 (0.83, 0.92) | 12.97 (5.89, 28.57)     | 5.29 (3.37, 8.29)    | 0.42 (0.27, 0.63) | 0.87 (0.85, 0.89) |
| Overall                            |                |           | 0.34 (0.27, 0.42)          | 0.95 (0.92, 0.96) | 9.32 (6.26, 13.87)      | 6.46 (4.66, 8.95)    | 0.69 (0.62, 0.77) | 0.74 (0.70, 0.76) |
| Heterogeneity - I <sup>2</sup> (%) |                |           | 92.1 (NA, NA)              | 93.1 (NA, NA)     | 64.9 (44.2, 77.9)       | 94.2 (NA, NA)        | 96.4 (NA, NA)     | 99.7 (99.7, 99.8) |
| p-value                            |                |           | <0.001                     | <0.001            | <0.001                  | <0.001               | <0.001            | <0.001            |
| Threshold: 3.25                    |                |           |                            |                   |                         |                      |                   |                   |
| Boursier, 2019                     | 938            | 3.25      | 0.92 (0.89, 0.94)          | 0.96 (0.94, 0.98) | 303.44 (170.23, 540.89) | 25.54 (16.59, 39.32) | 0.08 (0.06, 0.12) | 0.76 (0.71, 0.81) |
| Chan, 2019                         | 583            | 3.25      | 0.23 (0.15, 0.32)          | 0.97 (0.95, 0.98) | 9.04 (4.52, 18.08)      | 7.23 (3.91, 13.36)   | 0.79 (0.71, 0.88) | 0.75 (0.64, 0.87) |
| Ki, 2013                           | 142            | 3.25      | 0.48 (0.33, 0.63)          | 0.93 (0.86, 0.97) | 11.65 (4.45, 30.52)     | 6.55 (3.02, 14.23)   | 0.56 (0.42, 0.74) | 0.83 (0.75, 0.88) |
| Lang, 2020                         | 95             | 3.25      | 0.39 (0.22, 0.58)          | 0.97 (0.89, 1.00) | 19.58 (4.02, 95.31)     | 12.38 (2.95, 51.97)  | 0.63 (0.47, 0.83) | 0.85 (0.78, 0.94) |
| Lum, 2020                          | 263            | 3.25      | 0.21 (0.13, 0.32)          | 0.91 (0.86, 0.95) | 2.82 (1.34, 5.91)       | 2.43 (1.29, 4.56)    | 0.86 (0.76, 0.97) | 0.68 (0.61, 0.75) |
| McPherson, 2013a                   | 70             | 3.25      | 0.35 (0.14, 0.62)          | 0.98 (0.90, 1.00) | 28.36 (3.10, 259.77)    | 18.70 (2.41, 144.62) | 0.65 (0.46, 0.93) | 0.86 (0.77, 0.96) |
| McPherson, 2013b                   | 235            | 3.25      | 0.20 (0.09, 0.35)          | 0.98 (0.95, 0.99) | 11.52 (3.28, 40.43)     | 9.46 (2.99, 29.94)   | 0.82 (0.70, 0.95) | 0.85 (0.79, 0.92) |
| Perez, 2013                        | 243            | 3.25      | 0.56 (0.35, 0.75)          | 0.89 (0.84, 0.93) | 10.00 (4.19, 23.86)     | 5.00 (3.01, 8.29)    | 0.50 (0.32, 0.76) | 0.74 (0.65, 0.84) |
| Xun, 2012                          | 152            | 3.25      | 0.21 (0.07, 0.42)          | 0.97 (0.92, 0.99) | 8.16 (2.01, 33.1)       | 6.66 (1.92, 23.04)   | 0.81 (0.66, 1.0)  | 0.75 (0.63, 0.87) |
| Overall                            |                |           | 0.39 (0.22, 0.59)          | 0.95 (0.93, 0.97) | 14.23 (5.92, 34.19)     | 8.97 (4.87, 16.50)   | 0.63 (0.45, 0.86) | 0.76 (0.7, 0.88)  |
| Heterogeneity - I <sup>2</sup> (%) |                |           | 94.2 (NA, NA)              | 91 (NA, NA)       | 91.3 (86.7, 94.3)       | 94.2 (NA, NA)        | 95.4 (NA, NA)     | 98.7 (98.3, 99)   |
| p-value                            |                |           | <0.001                     | <0.001            | <0.001                  | <0.001               | <0.001            | <0.001            |

FIB-4, fibrosis-4; CI, confidence interval; SE, sensitivity; SP, specificity; DOR, diagnostic odds ratio; LR+, positive likelihood ratio; LR-, negative likelihood ratio; AUC, area under the curve; NA, not available.



**Supplementary Table 2.** Summary Statistics of NFS at Various Thresholds for Prediction of Advanced Fibrosis

| Author (year)              | No. of samples | Threshold | Advanced fibrosis (95% CI) |                   |                        |                      |                   |                   |
|----------------------------|----------------|-----------|----------------------------|-------------------|------------------------|----------------------|-------------------|-------------------|
|                            |                |           | SE                         | SP                | DOR                    | LR+                  | LR-               | AUC               |
| Threshold: -1.98 to -1.036 |                |           |                            |                   |                        |                      |                   |                   |
| Siddiqui, 2020             | 1,904          | -1.98     | 0.90 (0.87, 0.92)          | 0.41 (0.38, 0.44) | 6.21 (4.59, 8.39)      | 1.52 (1.44, 1.60)    | 0.25 (0.19, 0.32) | 0.80 (0.71, 0.88) |
| Anstee, 2019               | 2,417          | -1.455    | 0.89 (0.88, 0.9)           | 0.37 (0.33, 0.41) | 4.74 (3.75, 5.98)      | 1.41 (1.32, 1.52)    | 0.30 (0.25, 0.35) | 0.74 (0.72, 0.76) |
| Balakrishnan, 2020         | 99             | -1.455    | 0.81 (0.65, 0.92)          | 0.66 (0.53, 0.78) | 8.37 (3.15, 22.22)     | 2.35 (1.61, 3.43)    | 0.30 (0.15, 0.58) | 0.79 (0.69, 0.88) |
| Demir, 2013                | 120            | -1.455    | 0.75 (0.48, 0.93)          | 0.93 (0.87, 0.97) | 41.57 (10.59, 163.12)  | 10.29 (4.88, 21.71)  | 0.29 (0.13, 0.63) | 0.96 (0.92, 0.99) |
| Goh, 2015a                 | 238            | -1.455    | 0.90 (0.82, 0.95)          | 0.19 (0.13, 0.27) | 2.08 (0.92, 4.69)      | 1.11 (0.99, 1.23)    | 0.55 (0.27, 1.10) | NA                |
| Goh, 2015b                 | 263            | -1.455    | 0.62 (0.47, 0.76)          | 0.65 (0.58, 0.71) | 3.02 (1.55, 5.86)      | 1.75 (1.31, 2.34)    | 0.59 (0.40, 0.86) | NA                |
| Joo, 2017                  | 315            | -1.455    | 0.87 (0.76, 0.95)          | 0.60 (0.54, 0.66) | 10.29 (4.48, 23.61)    | 2.16 (1.81, 2.59)    | 0.22 (0.11, 0.44) | 0.84 (0.78, 0.90) |
| Jun, 2017                  | 328            | -1.455    | 0.53 (0.4, 0.66)           | 0.67 (0.61, 0.72) | 2.30 (1.30, 4.05)      | 1.60 (1.20, 2.14)    | 0.70 (0.53, 0.93) | 0.64 (0.56, 0.72) |
| Kaya, 2020                 | 463            | -1.455    | 0.72 (0.6, 0.81)           | 0.63 (0.58, 0.68) | 4.31 (2.55, 7.29)      | 1.93 (1.60, 2.33)    | 0.45 (0.32, 0.65) | 0.71 (0.65, 0.77) |
| Ki, 2013                   | 142            | -1.455    | 0.91 (0.79, 0.98)          | 0.43 (0.33, 0.53) | 7.83 (2.6, 23.57)      | 1.58 (1.30, 1.92)    | 0.22 (0.09, 0.56) | 0.79 (0.72, 0.86) |
| Labenz, 2018               | 261            | -1.455    | 0.68 (0.52, 0.82)          | 0.65 (0.58, 0.71) | 4.00 (1.96, 8.17)      | 1.94 (1.47, 2.55)    | 0.50 (0.32, 0.78) | 0.73 (0.68, 0.78) |
| Lang, 2020                 | 95             | -1.455    | 0.81 (0.63, 0.93)          | 0.72 (0.59, 0.82) | 10.65 (3.75, 30.26)    | 2.80 (1.83, 4.28)    | 0.28 (0.14, 0.57) | 0.86 (0.75, 0.94) |
| Lum, 2020                  | 263            | -1.455    | 0.75 (0.64, 0.84)          | 0.65 (0.58, 0.72) | 5.58 (3.09, 10.07)     | 2.13 (1.69, 2.69)    | 0.39 (0.26, 0.57) | 0.65 (0.58, 0.73) |
| McPherson, 2013a           | 70             | -1.455    | 0.82 (0.57, 0.96)          | 0.51 (0.37, 0.65) | 4.85 (1.25, 18.85)     | 1.64 (1.15, 2.34)    | 0.38 (0.14, 1.01) | 0.85 (0.74, 0.96) |
| McPherson, 2013b           | 235            | -1.455    | 0.71 (0.54, 0.84)          | 0.65 (0.58, 0.72) | 4.48 (2.15, 9.33)      | 2.00 (1.52, 2.63)    | 0.46 (0.29, 0.74) | 0.80 (0.72, 0.88) |
| Patel, 2018a               | 108            | -1.455    | 0.08 (0.00, 0.36)          | 0.35 (0.25, 0.45) | 0.04 (0.01, 0.36)      | 0.16 (0.04, 0.75)    | 2.56 (1.84, 3.55) | 0.22 (0.12, 0.32) |
| Patel, 2018b               | 147            | -1.455    | 0.02 (0.00, 0.10)          | 0.62 (0.52, 0.72) | 0.03 (0.00, 0.24)      | 0.02 (0.00, 0.40)    | 1.60 (1.36, 1.87) | 0.32 (0.27, 0.37) |
| Petta, 2019                | 968            | -1.455    | 0.74 (0.69, 0.79)          | 0.70 (0.66, 0.73) | 6.63 (4.84, 9.08)      | 2.44 (2.14, 2.79)    | 0.37 (0.30, 0.46) | 0.76 (0.71, 0.81) |
| Singh, 2020                | 1,057          | -1.455    | 0.64 (0.59, 0.69)          | 0.70 (0.67, 0.74) | 4.22 (3.21, 5.56)      | 2.15 (1.88, 2.47)    | 0.51 (0.44, 0.59) | 0.72 (0.69, 0.75) |
| Treeraprasertsuk, 2016     | 139            | -1.455    | 0.89 (0.52, 1.00)          | 0.48 (0.39, 0.57) | 7.29 (0.89, 59.99)     | 1.63 (1.20, 2.21)    | 0.31 (0.07, 1.39) | 0.66 (0.61, 0.71) |
| Wong, 2008                 | 128            | -1.455    | 0.39 (0.17, 0.64)          | 0.81 (0.74, 0.87) | 2.76 (0.98, 7.77)      | 2.08 (1.08, 3.98)    | 0.74 (0.51, 1.08) | 0.64 (0.49, 0.79) |
| Wong, 2010                 | 246            | -1.455    | 0.73 (0.60, 0.84)          | 0.69 (0.62, 0.76) | 6.22 (3.19, 12.12)     | 2.38 (1.82, 3.10)    | 0.39 (0.25, 0.61) | 0.75 (0.67, 0.83) |
| Xun, 2012                  | 152            | -1.455    | 0.38 (0.19, 0.59)          | 0.86 (0.79, 0.91) | 3.67 (1.40, 9.62)      | 2.64 (1.37, 5.09)    | 0.72 (0.52, 0.99) | 0.65 (0.52, 0.78) |
| Overall                    |                |           | 0.70 (0.57, 0.80)          | 0.61 (0.53, 0.69) | 3.77 (2.16, 6.56)      | 1.83 (1.46, 2.28)    | 0.48 (0.33, 0.70) | 0.72 (0.66, 0.79) |
| Heterogeneity - $I^2$ (%)  |                |           | 96.2 (NA, NA)              | 98.4 (NA, NA)     | 75.7 (65.1, 83.1)      | 97.6 (NA, NA)        | 95.6 (NA, NA)     | 99.7 (99.6, 99.7) |
| p-value                    |                |           | <0.001                     | <0.001            | <0.001                 | <0.001               | <0.001            | <0.001            |
| Threshold: -0.126 to 0.19  |                |           |                            |                   |                        |                      |                   |                   |
| Nasr, 2016                 | 58             | -0.126    | 0.83 (0.52, 0.98)          | 0.83 (0.69, 0.92) | 23.75 (4.34, 129.86)   | 4.79 (2.43, 9.44)    | 0.20 (0.05, 0.71) | 0.85 (0.74, 0.97) |
| Siddiqui, 2020             | 1,904          | 0.19      | 0.43 (0.39, 0.47)          | 0.90 (0.88, 0.92) | 6.78 (5.30, 8.66)      | 4.29 (3.56, 5.17)    | 0.63 (0.58, 0.68) | 0.80 (0.71, 0.88) |
| Overall                    |                |           | 0.61 (0.28, 0.86)          | 0.87 (0.79, 0.92) | 10.79 (3.65, 31.84)    | 4.79 (3.13, 7.35)    | 0.44 (0.20, 0.97) | 0.80 (0.78, 0.88) |
| Heterogeneity - $I^2$ (%)  |                |           | 66.6 (NA, NA)              | 0 (NA, NA)        | 51.2 (0, 87.6)         | 0 (NA, NA)           | 56.8 (NA, NA)     | 0 (NA, NA)        |
| p-value                    |                |           | 0.015                      | 0.111             | 0.152                  | 0.538                | 0.033             | 0.327             |
| Threshold: 0.675 to 0.735  |                |           |                            |                   |                        |                      |                   |                   |
| Chan, 2019                 | 583            | 0.675     | 0.17 (0.1, 0.25)           | 0.99 (0.98, 1.00) | 21.6 (7.09, 65.79)     | 16.49 (5.98, 45.45)  | 0.83 (0.76, 0.91) | 0.70 (0.57, 0.83) |
| Lum, 2020                  | 263            | 0.675     | 0.20 (0.12, 0.30)          | 0.95 (0.91, 0.98) | 4.83 (2.03, 11.48)     | 3.94 (1.85, 8.38)    | 0.83 (0.74, 0.94) | 0.65 (0.58, 0.73) |
| Anstee, 2019               | 2,417          | 0.676     | 0.38 (0.36, 0.40)          | 0.89 (0.86, 0.92) | 4.99 (3.70, 6.73)      | 3.43 (2.65, 4.45)    | 0.69 (0.66, 0.73) | 0.74 (0.72, 0.76) |
| Balakrishnan, 2020         | 99             | 0.676     | 0.32 (0.18, 0.50)          | 0.95 (0.86, 0.99) | 9.44 (2.45, 36.37)     | 5.92 (1.94, 18.05)   | 0.71 (0.56, 0.89) | 0.79 (0.69, 0.88) |
| Boursier, 2019             | 938            | 0.676     | 0.90 (0.86, 0.92)          | 0.94 (0.92, 0.96) | 140.01 (86.25, 227.26) | 15.32 (10.95, 21.43) | 0.11 (0.08, 0.15) | 0.72 (0.67, 0.77) |

**Supplementary Table 2. Continued**

| Author (year)                      | No. of samples | Threshold | Advanced fibrosis [95% CI] |                   |                       |                      |                   |                   | AUC |
|------------------------------------|----------------|-----------|----------------------------|-------------------|-----------------------|----------------------|-------------------|-------------------|-----|
|                                    |                |           | SE                         | SP                | DOR                   | LR+                  | LR-               |                   |     |
| Carli, 2019                        | 266            | 0.676     | 0.10 (0.00, 0.44)          | 0.97 (0.93, 0.99) | 3.17 (0.36, 28.1)     | 3.80 (0.74, 19.34)   | 0.89 (0.70, 1.13) | NA                |     |
| Chan, 2015                         | 147            | 0.676     | 0.40 (0.05, 0.85)          | 0.97 (0.89, 1.00) | 21.00 (2.16, 204.61)  | 11.00 (2.35, 51.36)  | 0.60 (0.30, 1.19) | NA                |     |
| Demir, 2013                        | 120            | 0.676     | 0.19 (0.04, 0.46)          | 1.00 (0.97, 1.00) | 54.19 (2.65, 1106.91) | 43.23 (2.33, 800.47) | 0.79 (0.62, 1.01) | 0.96 (0.92, 0.99) |     |
| Goh, 2015a                         | 238            | 0.676     | 0.49 (0.39, 0.60)          | 0.86 (0.78, 0.91) | 5.82 (3.07, 11.02)    | 3.37 (2.12, 5.34)    | 0.59 (0.47, 0.73) | NA                |     |
| Goh, 2015b                         | 263            | 0.676     | 0.13 (0.05, 0.27)          | 0.97 (0.94, 0.99) | 4.64 (1.48, 14.54)    | 4.12 (1.51, 11.22)   | 0.88 (0.78, 1.00) | NA                |     |
| Joo, 2017                          | 315            | 0.676     | 0.47 (0.34, 0.61)          | 0.93 (0.90, 0.96) | 12.82 (6.22, 26.39)   | 7.05 (4.15, 11.99)   | 0.56 (0.43, 0.72) | 0.84 (0.78, 0.90) |     |
| Jun, 2017                          | 328            | 0.676     | 0.08 (0.03, 0.18)          | 0.98 (0.96, 0.99) | 4.78 (1.34, 17.08)    | 4.40 (1.39, 13.90)   | 0.92 (0.85, 1.00) | 0.64 (0.56, 0.72) |     |
| Kaya, 2020                         | 463            | 0.676     | 0.15 (0.08, 0.24)          | 0.96 (0.94, 0.98) | 4.57 (2.03, 10.3)     | 4.02 (1.96, 8.25)    | 0.88 (0.80, 0.96) | 0.71 (0.65, 0.77) |     |
| Ki, 2013                           | 142            | 0.676     | 0.57 (0.41, 0.71)          | 0.84 (0.76, 0.91) | 7.02 (3.15, 15.66)    | 3.52 (2.09, 5.94)    | 0.51 (0.37, 0.72) | 0.79 (0.72, 0.86) |     |
| Labenz, 2018                       | 261            | 0.676     | 0.34 (0.20, 0.51)          | 0.93 (0.89, 0.96) | 7.09 (3.09, 16.28)    | 4.92 (2.60, 9.29)    | 0.70 (0.56, 0.87) | 0.73 (0.68, 0.78) |     |
| Lang, 2020                         | 95             | 0.676     | 0.39 (0.22, 0.58)          | 0.98 (0.92, 1.00) | 39.79 (4.86, 326.07)  | 16.92 (3.28, 87.24)  | 0.62 (0.47, 0.82) | 0.86 (0.75, 0.94) |     |
| McPherson, 2013a                   | 70             | 0.676     | 0.47 (0.23, 0.72)          | 0.98 (0.90, 1.00) | 46.22 (5.14, 415.48)  | 17.00 (3.25, 88.67)  | 0.54 (0.34, 0.84) | 0.85 (0.74, 0.96) |     |
| McPherson, 2013b                   | 235            | 0.676     | 0.27 (0.14, 0.43)          | 0.97 (0.93, 0.99) | 11.49 (3.95, 33.39)   | 8.21 (3.33, 20.24)   | 0.75 (0.62, 0.90) | 0.80 (0.72, 0.88) |     |
| Patel, 2018a                       | 108            | 0.676     | 0.46 (0.19, 0.75)          | 0.98 (0.93, 1.00) | 39.86 (6.75, 235.2)   | 17.82 (4.63, 68.53)  | 0.55 (0.33, 0.89) | 0.72 (0.56, 0.87) |     |
| Patel, 2018b                       | 147            | 0.676     | 0.67 (0.53, 0.80)          | 0.83 (0.74, 0.90) | 10.17 (4.61, 22.4)    | 3.89 (2.41, 6.28)    | 0.39 (0.26, 0.59) | 0.76 (0.68, 0.83) |     |
| Perez, 2013                        | 243            | 0.676     | 0.52 (0.32, 0.71)          | 0.87 (0.82, 0.91) | 7.23 (3.08, 16.97)    | 3.94 (2.40, 6.46)    | 0.55 (0.37, 0.81) | 0.72 (0.6, 0.83)  |     |
| Petta, 2015a                       | 179            | 0.676     | 0.34 (0.2, 0.51)           | 0.99 (0.96, 1.00) | 71.04 (8.96, 563.13)  | 31.99 (6.17, 165.79) | 0.66 (0.53, 0.82) | 0.80 (0.71, 0.89) |     |
| Petta, 2015b                       | 142            | 0.676     | 0.14 (0.04, 0.32)          | 1.00 (0.97, 1.00) | 40.06 (2.09, 767.77)  | 34.2 (1.89, 617.79)  | 0.85 (0.75, 0.99) | 0.73 (0.62, 0.83) |     |
| Petta, 2019                        | 968            | 0.676     | 0.16 (0.12, 0.21)          | 0.97 (0.95, 0.98) | 5.93 (3.49, 10.09)    | 5.05 (3.11, 8.22)    | 0.86 (0.81, 0.91) | 0.76 (0.71, 0.81) |     |
| Singh, 2020                        | 1,057          | 0.676     | 0.64 (0.59, 0.69)          | 0.70 (0.67, 0.74) | 4.22 (3.21, 5.56)     | 2.15 (1.87, 2.46)    | 0.51 (0.43, 0.59) | 0.72 (0.69, 0.75) |     |
| Wong, 2008                         | 128            | 0.676     | 0.00 (0.00, 0.19)          | 0.99 (0.95, 1.00) | 1.54 (0.07, 33.34)    | 1.52 (0.07, 30.61)   | 0.99 (0.91, 1.07) | 0.64 (0.49, 0.79) |     |
| Wong, 2010                         | 246            | 0.676     | 0.18 (0.09, 0.30)          | 0.96 (0.93, 0.99) | 5.68 (2.05, 15.74)    | 4.69 (1.92, 11.31)   | 0.84 (0.74, 0.96) | 0.75 (0.67, 0.83) |     |
| Xun, 2012                          | 152            | 0.676     | 0.08 (0.01, 0.27)          | 1.00 (0.97, 1.00) | 28.56 (1.33, 614.66)  | 25.8 (1.27, 521.32)  | 0.90 (0.79, 1.03) | 0.65 (0.52, 0.78) |     |
| Yang, 2019                         | 453            | 0.676     | 0.20 (0.13, 0.28)          | 0.92 (0.88, 0.94) | 2.75 (1.53, 4.96)     | 3.39 (1.45, 3.94)    | 0.87 (0.79, 0.95) | 0.52 (0.41, 0.63) |     |
| Yoneda, 2013                       | 235            | 0.676     | 0.68 (0.51, 0.82)          | 0.88 (0.82, 0.92) | 15.62 (6.97, 34.98)   | 5.72 (3.70, 8.85)    | 0.36 (0.22, 0.57) | 0.84 (0.79, 0.89) |     |
| Yoneda, 2013                       | 235            | 0.735     | 0.68 (0.51, 0.82)          | 0.88 (0.83, 0.92) | 16.39 (7.29, 36.87)   | 5.49 (3.57, 8.43)    | 0.36 (0.23, 0.57) | 0.84 (0.79, 0.89) |     |
| Overall                            |                |           | 0.31 (0.23, 0.41)          | 0.95 (0.93, 0.97) | 10.17 (7.06, 14.63)   | 7.29 (5.34, 9.93)    | 0.71 (0.63, 0.81) | 0.73 (0.71, 0.81) |     |
| Heterogeneity - I <sup>2</sup> (%) |                |           | 96 (NA, NA)                | 96.6 (NA, NA)     | 84.5 (79.6, 88.3)     | 92.6 (NA, NA)        | 96.9 (NA, NA)     | 99.6 (99.5, 99.6) |     |
| p-value                            |                |           | <0.001                     | <0.001            | <0.001                | <0.001               | <0.001            | <0.001            |     |

NFS, nonalcoholic fatty liver disease fibrosis score; CI, confidence interval; SE, sensitivity; SP, specificity; DOR, diagnostic odds ratio; LR+, positive likelihood ratio; LR-, negative likelihood ratio; AUC, area under the curve; NA, not available.

**Supplementary Table 3.** Summary Statistics of FIB-4 at Various Thresholds for Prediction of Significant Fibrosis

| Author (year)                      | No. of samples | Threshold | SE                | SP                | DOR                | LR+                  | LR-               | AUC               |
|------------------------------------|----------------|-----------|-------------------|-------------------|--------------------|----------------------|-------------------|-------------------|
| Threshold: 0.66–0.89               |                |           |                   |                   |                    |                      |                   |                   |
| Kao, 2020                          | 73             | 0.66      | 0.55 [0.36, 0.74] | 0.86 [0.73, 0.95] | 7.79 [2.52, 24.13] | 4.04 [1.79, 9.12]    | 0.51 [0.34, 0.79] | 0.72 [0.65, 0.80] |
| Ooi, 2017a                         | 101            | 0.74      | 0.78 [0.56, 0.93] | 0.47 [0.36, 0.59] | 3.25 [1.10, 9.62]  | 1.48 [1.10, 2.01]    | 0.45 [0.20, 1.03] | 0.64 [0.47, 0.81] |
| Ooi, 2017b                         | 53             | 0.74      | 0.86 [0.42, 1.00] | 0.52 [0.37, 0.67] | 6.55 [0.73, 58.76] | 1.79 [1.16, 2.74]    | 0.27 [0.04, 1.71] | 0.77 [0.62, 0.92] |
| Zhou, 2019                         | 207            | 0.89      | 0.66 [0.46, 0.82] | 0.58 [0.50, 0.65] | 2.61 [1.15, 5.93]  | 1.55 [1.13, 2.13]    | 0.59 [0.35, 0.99] | 0.62 [0.37, 0.88] |
| Overall                            |                |           | 0.69 [0.55, 0.80] | 0.61 [0.44, 0.76] | 3.58 [1.96, 6.53]  | 1.79 [1.26, 2.55]    | 0.50 [0.35, 0.70] | 0.66 [0.61, 0.77] |
| Heterogeneity - I <sup>2</sup> (%) |                |           | 4.2 (NA, NA)      | 87 (NA, NA)       | 0 [0, 82.8]        | 85.6 (NA, NA)        | 57.8 (NA, NA)     | 0 [0, 74.3]       |
| p-value                            |                |           | 0.253             | 0.001             | 0.445              | <0.001               | 0.021             | 0.618             |
| Threshold: 1.4–1.9                 |                |           |                   |                   |                    |                      |                   |                   |
| Kakisaka, 2018                     | 63             | 1.4       | 0.68 [0.51, 0.81] | 0.78 [0.56, 0.93] | 7.48 [2.27, 24.61] | 3.10 [1.38, 6.94]    | 0.41 [0.25, 0.68] | 0.76 [0.75, 0.78] |
| Kao, 2020                          | 73             | 1.9       | 0.62 [0.42, 0.79] | 0.59 [0.43, 0.74] | 2.36 [0.90, 6.18]  | 1.51 [0.96, 2.39]    | 0.64 [0.37, 1.08] | 0.61 [0.48, 0.73] |
| Overall                            |                |           | 0.65 [0.53, 0.75] | 0.66 [0.51, 0.79] | 3.69 [1.61, 8.49]  | 1.94 [1.21, 3.09]    | 0.52 [0.35, 0.78] | 0.74 [0.54, 0.85] |
| Heterogeneity - I <sup>2</sup> (%) |                |           | 0 (NA, NA)        | 11.2 (NA, NA)     | 54 [0, 88.7]       | 76.8 (NA, NA)        | 0 (NA, NA)        | 84.3 [35.7, 96.2] |
| p-value                            |                |           | 0.64              | 0.122             | 0.14               | 0.004                | 0.296             | 0.012             |
| Threshold: 2.67–3.25               |                |           |                   |                   |                    |                      |                   |                   |
| Meneses, 2020                      | 50             | 2.67      | 0.11 [0.00, 0.48] | 0.98 [0.87, 1.00] | 5.13 [0.29, 90.7]  | 12.6 [0.55, 286.89]  | 0.86 [0.66, 1.11] | 0.69 [0.61, 0.76] |
| Ooi, 2017a                         | 101            | 3.25      | 0.04 [0.00, 0.22] | 0.99 [0.93, 1.00] | 3.55 [0.21, 59.00] | 9.87 [0.41, 234.59]  | 0.94 [0.84, 1.04] | 0.64 [0.54, 0.74] |
| Overall                            |                |           | 0.06 [0.02, 0.22] | 0.98 [0.94, 1.00] | 4.25 [0.57, 31.68] | 10.82 [0.47, 257.67] | 0.93 [0.85, 1.02] | 0.67 [0.61, 0.73] |
| Heterogeneity - I <sup>2</sup> (%) |                |           | 0 (NA, NA)        | 0 (NA, NA)        | 0 (NA, NA)         | -                    | 0 (NA, NA)        | 0 (NA, NA)        |
| p-value                            |                |           | 0.492             | 0.652             | 0.419              | -                    | 0.857             | 0.45              |

FIB-4, fibrosis-4; CI, confidence interval; SE, sensitivity; SP, specificity; DOR, diagnostic odds ratio; LR+, positive likelihood ratio; LR-, negative likelihood ratio; AUC, area under the curve; NA, not available.

**Supplementary Table 4.** Summary Statistics of NFS at Various Thresholds for Prediction of Significant Fibrosis

| Author (year)                      | No. of samples | Threshold | SE                | SP                | DOR                | LR+                | LR-               | AUC               |
|------------------------------------|----------------|-----------|-------------------|-------------------|--------------------|--------------------|-------------------|-------------------|
| Threshold: -3.168 to -1.455        |                |           |                   |                   |                    |                    |                   |                   |
| Zhou, 2019                         | 207            | -3.168    | 0.76 [0.56, 0.90] | 0.46 [0.39, 0.54] | 2.68 [1.09, 6.6]   | 1.40 [1.09, 1.79]  | 0.52 [0.26, 1.01] | 0.60 [0.45, 0.75] |
| Wong, 2008                         | 128            | -1.455    | 0.37 [0.22, 0.53] | 0.84 [0.77, 0.90] | 3.10 [1.39, 6.91]  | 2.32 [1.30, 4.14]  | 0.75 [0.58, 0.96] | 0.67 [0.60, 0.74] |
| Overall                            |                |           | 0.57 [0.28, 0.81] | 0.68 [0.37, 0.88] | 2.82 [1.53, 5.18]  | 1.78 [1.11, 2.84]  | 0.63 [0.42, 0.94] | 0.61 [0.58, 0.72] |
| Heterogeneity - I <sup>2</sup> (%) |                |           | 80.6 (NA, NA)     | 95.1 (NA, NA)     | 0 (NA, NA)         | 77.2 (NA, NA)      | 66.9 (NA, NA)     | 0 (NA, NA)        |
| p-value                            |                |           | 0.002             | <0.001            | 0.816              | 0.003              | 0.015             | 0.404             |
| Threshold: 0.676                   |                |           |                   |                   |                    |                    |                   |                   |
| Meneses, 2020                      | 50             | 0.676     | 0.22 [0.03, 0.60] | 0.8 [0.65, 0.91]  | 1.18 [0.20, 6.79]  | 1.23 [0.36, 4.22]  | 0.94 [0.63, 1.38] | 0.43 [0.36, 0.5]  |
| Ooi, 2017a                         | 101            | 0.676     | 0.09 [0.01, 0.28] | 0.88 [0.79, 0.95] | 0.73 [0.15, 3.65]  | 0.86 [0.23, 3.23]  | 1.01 [0.86, 1.19] | 0.62 [0.53, 0.7]  |
| Wong, 2008                         | 128            | 0.676     | 0.00 [0.00, 0.09] | 0.98 [0.94, 1.00] | 0.58 [0.03, 12.24] | 0.58 [0.02, 11.85] | 1.00 [0.96, 1.05] | 0.67 [0.62, 0.72] |
| Overall                            |                |           | 0.04 [0.01, 0.25] | 0.92 [0.77, 0.98] | 0.52 [0.07, 3.59]  | 0.54 [0.08, 3.49]  | 1.03 [0.96, 1.12] | 0.53 [0.42, 0.73] |
| Heterogeneity - I <sup>2</sup> (%) |                |           | 62.2 (NA, NA)     | 82.4 (NA, NA)     | 0 [0, 9.6]         | 0 (NA, NA)         | 0 (NA, NA)        | 93.6 [84.6, 97.3] |
| p-value                            |                |           | 0.602             | 0.005             | 0.891              | 0.994              | 0.558             | <0.001            |
| Threshold: 1.292                   |                |           |                   |                   |                    |                    |                   |                   |
| Ooi, 2017a                         | 101            | 1.292     | 0.78 [0.56, 0.93] | 0.37 [0.26, 0.49] | 2.13 [0.71, 6.35]  | 1.24 [0.94, 1.63]  | 0.58 [0.25, 1.33] | 0.62 [0.55, 0.68] |
| Ooi, 2017b                         | 53             | 1.292     | 0.86 [0.42, 1.00] | 0.17 [0.08, 0.31] | 1.26 [0.13, 11.99] | 1.03 [0.74, 1.44]  | 0.82 [0.12, 5.60] | 0.70 [0.64, 0.77] |
| Overall                            |                |           | 0.81 [0.59, 0.92] | 0.27 [0.16, 0.44] | 1.65 [0.50, 5.36]  | 1.12 [0.87, 1.44]  | 0.67 [0.26, 1.73] | 0.67 [0.57, 0.75] |
| Heterogeneity - I <sup>2</sup> (%) |                |           | 0 (NA, NA)        | 62 (NA, NA)       | 0 (NA, NA)         | 23.6 (NA, NA)      | 0 (NA, NA)        | 71.9 [0, 93.7]    |
| p-value                            |                |           | 0.668             | 0.023             | 0.682              | 0.103              | 0.783             | 0.059             |

NFS, nonalcoholic fatty liver disease fibrosis score; CI, confidence interval; SE, sensitivity; SP, specificity; DOR, diagnostic odds ratio; LR+, positive likelihood ratio; LR-, negative likelihood ratio; AUC, area under the curve; NA, not available.

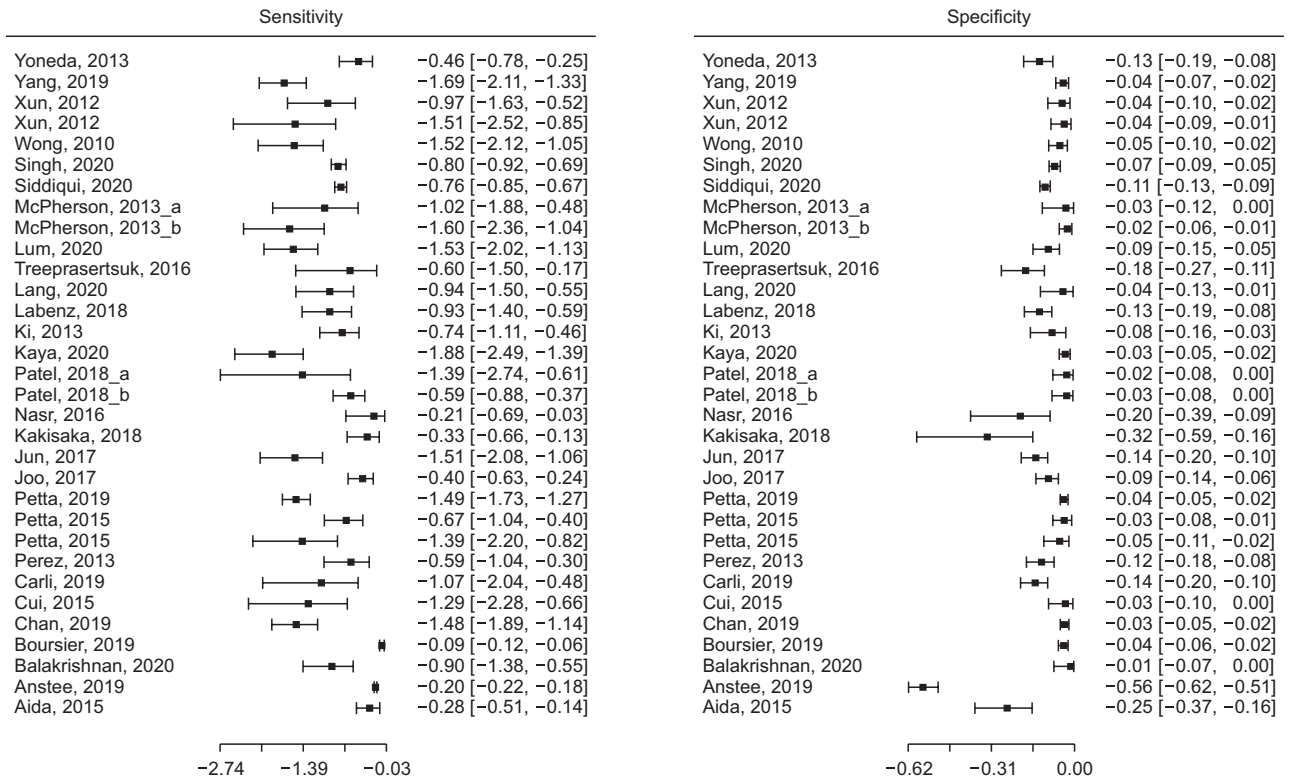

Supplementary Fig. 1. Forest plot of fibrosis-4 (FIB-4) index for predicting advanced fibrosis; sensitivity and specificity of FIB-4 index.

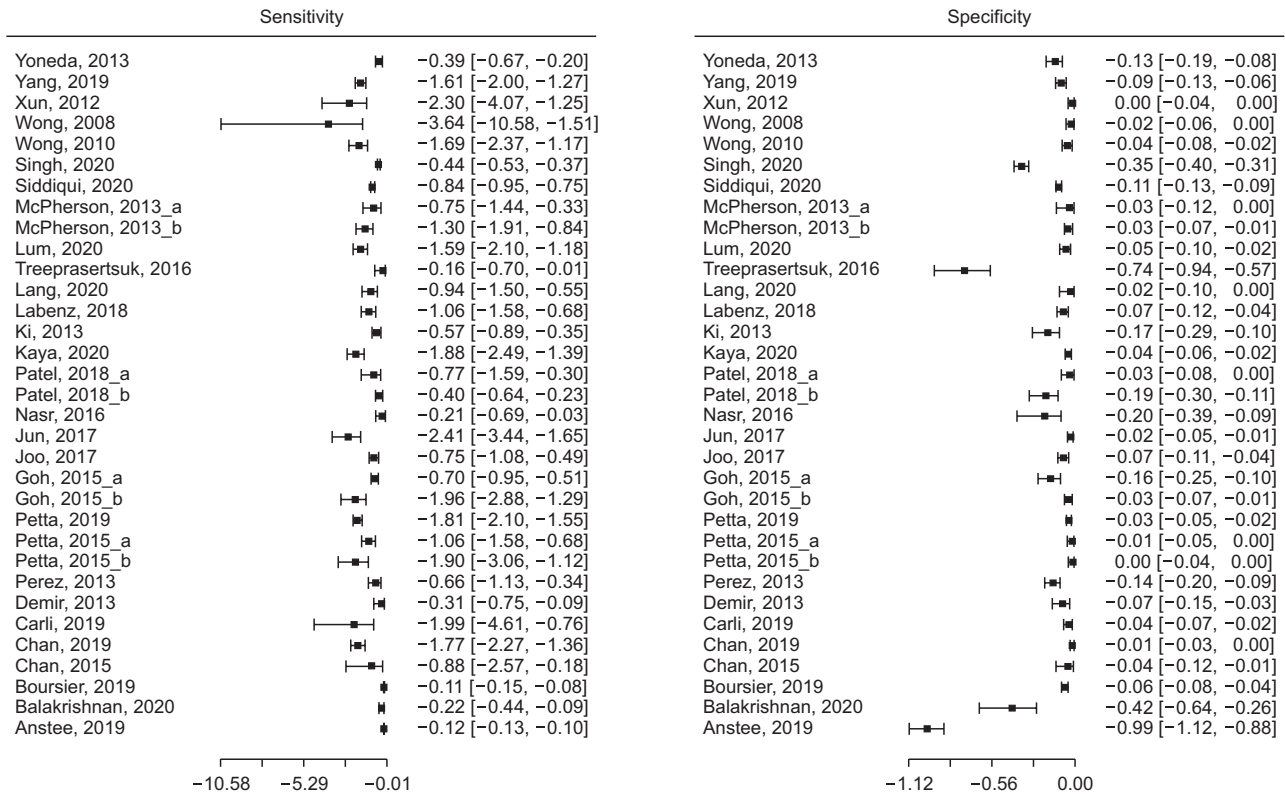

**Supplementary Fig. 2.** Forest plot NAFLD fibrosis score (NFS) for predicting advanced fibrosis; sensitivity and specificity of NFS. NAFLD, nonalcoholic fatty liver disease.

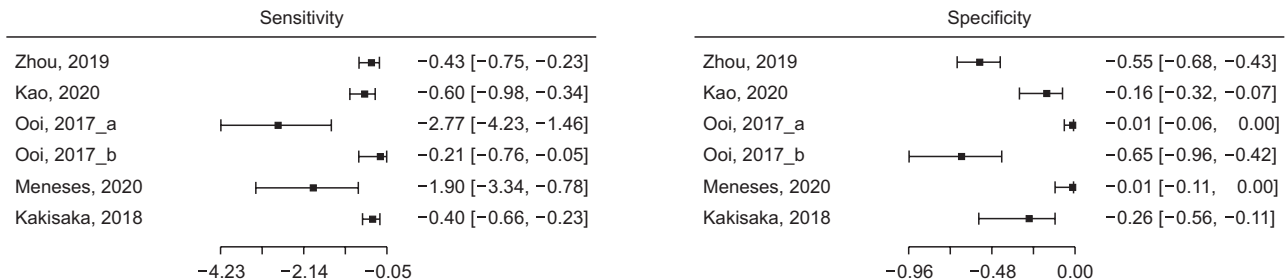

**Supplementary Fig. 3.** Forest plot of fibrosis-4 (FIB-4) index for predicting significant fibrosis; sensitivity and specificity of FIB-4 index.

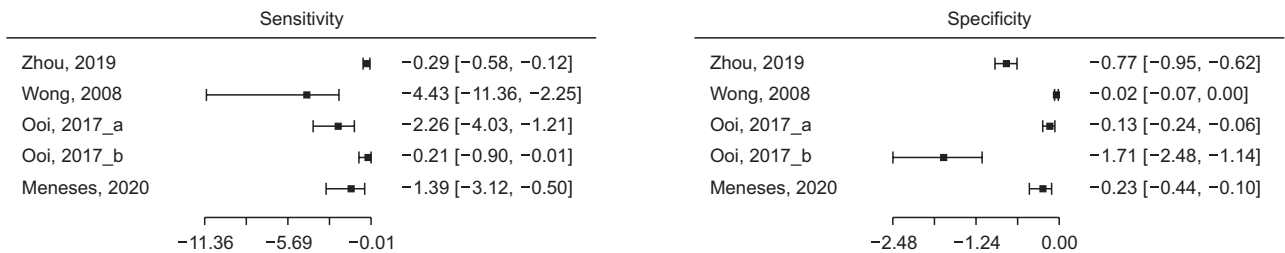

**Supplementary Fig. 4.** Forest plot NAFLD fibrosis score (NFS) for predicting significant fibrosis; sensitivity and specificity of NFS. NAFLD, nonalcoholic fatty liver disease.
